# Supplementary material for: MagIC-Cryo-EM, structural determination on magnetic beads for scarce macromolecules in heterogeneous samples
Source: eLife. 2025 May 20;13:RP103486. doi: 10.7554/eLife.103486 (PMC12092007; doi:10.7554/eLife.103486)
Supplement: Supplementary file 1. [file elife-103486-supp1.xlsx]

## Sheet: Sheet1
	Sample name	Nucleosome in polynucleosome attached on magnetic beads	in vitro reconstituted H1.8-GFP nucleosome MagIC-cryo-EM	Interphase H1.8-GFP nucleosome MagIC-cryo-EM	Metaphase H1.8-GFP nucleosome MagIC-cryo-EM	Interphase & metaphase mixed H1.8-GFP nucleosome MagIC-cryo-EM	Interphase H1.8-GFP-NPM2 MagIC-cryo-EM
	Deta collection
	Microscope	Talos Arctica	Titan Krios	Titan Krios	Titan Krios	-	Titan Krios
	Magnification	25,000	53,000	53,000	53,000	-	64,000 / 81,000
	Voltage (kV)	200	300	300	300	-	300
	Camera	Gatan K2 Summit	Gatan K3	Gatan K3	Gatan K3	-	Gatan K3
	Electron exposure (e–/Å )	34.4	45.45	45.45	45.45	-	45.3 / 51.92
	Defocus range (μm)	-1.5 ~ -2.5	-2 ~ -3.5	-2 ~ -3.5	-2 ~ -3.5	-	-2.0 ~ -3.5 / -1.5 ~ -3.5
	Pixel size (Å)	1.5	1.32	1.32	1.32	-	1.08 / 0.86
	Micrographs	734	1890	677	965	-	1,807 / 4,543
	Data prosessing						Avaraged	Open	Closed
	Particle images (no.)	41000	184706	20639	22051	42690	92428	35684	26477
	Symmetry imposed	C1	C1	C1	C1	C1	C5	C5	C5
	Map resolution (FSC=0.143)	4.8	3.6	4.3	4.1	3.9	5.0	5.9	5.2
	EMDR ID	EMD-42599	EMD-42598	EMD-42596	EMD-42597	EMD-42594	EMD-43238	EMD-43239	EMD-43240
	Atomic models						Avaraged	Open	Closed
	Chains						5	5	5
	Atoms						8535 (Hydrogens: 4245)	4315 (Hydrogens: 0)	4290 (Hydrogens: 0)
	Residues						Protein: 550 Nucleotide: 0	Protein: 555 Nucleotide: 0	Protein: 550 Nucleotide: 0
	Water						0	0	0
	Ligands						0	0	0
	Bonds (RMSD)
	Length (Å) (# > 4σ)						0.006 (15)	0.003 (0)	0.003 (0)
	Angles (°) (# > 4σ)						0.699 (10)	0.758 (5)	0.884 (0)
	MolProbity score						1.98	2.22	2.16
	Clash score						14.32	22.71	26.17
	Ramachandran plot (%)
	Outliers						0	0	0
	Allowed						4.63	5.5	3.7
	Favored						95.37	94.5	96.3
	Rama-Z (Ramachandran plot Z-score, RMSD)
	whole (N = 540)						-2.46 (0.30)	-2.90 (0.29)	-1.28 (0.33)
	helix (N = 0)						--- (---)	-3.48 (0.84)	-1.84 (1.07)
	sheet (N = 160)						-1.74 (0.46)	-1.27 (0.35)	-0.38 (0.31)
	loop (N = 380)						-1.71 (0.24)	-2.21 (0.26)	-1.10 (0.33)
	Rotamer outliers (%)						0	0	0
	Cβ outliers (%)						NA	NA	NA
	Peptide plane (%)
	Cis proline/general						33.3/0.0	28.6/0.0	33.3/0.0
	Twisted proline/general						0.0/0.0	0.0/0.0	0.0/1.0
	CaBLAM outliers (%)						2.83	1.87	3.77
	ADP (B-factors)
	Iso/Aniso (#)						4290/0	4315/0	4290/0
	min/max/mean
	Protein						311.84/446.13/375.67	250.02/795.91/470.81	343.54/628.84/480.26
	Nucleotide						---	---	---
	Ligand						---	---	---
	Water						---	---	---
	Occupancy
	Mean						1	1	1
	occ = 1 (%)						100	100	100
	0 < occ < 1 (%)						0	0	0
	occ > 1 (%)						0	0	0
	Lengths (Å)						82.08, 83.16, 62.64	84.24, 85.32, 58.32	79.92, 81.00, 69.12
	Angles (°)						90.00, 90.00, 90.00	90.00, 90.00, 90.00	90.00, 90.00, 90.00
	Supplied Resolution (Å)						6	6	6
	Resolution Estimates (Å)						Masked // Unmasked	Masked // Unmasked	Masked // Unmasked
	d FSC (half maps; 0.143)						--- // ---	--- // ---	--- // ---
	d 99 (full/half1/half2)						8.5/---/--- // 8.5/---/---	8.1/---/--- // 8.1/---/---	8.3/---/--- // 8.3/---/---
	d model						7.7 // 7.7	8.5 // 8.5	7.7 // 7.7
	d FSC model (0/0.143/0.5)						4.3/6.2/18.9 // 4.3/6.2/2.6	5.5/6.3/18.2 // 5.5/6.3/18.2	5.0/6.1/12.2 // 5.0/6.1/11.3
	Map min/max/mean						-9.45946	-10.4651	-15.1515
	CC (mask)						0.67	0.67	0.69
	CC (box)						0.79	0.75	0.8
	CC (peaks)						0.56	0.56	0.62
	CC (volume)						0.66	0.67	0.69
	Mean CC for ligands						---	---	---
	PDB ID						8VHI	8VHJ	8VHK

## Sheet: Sheet2
	Average	open	closed
Composition (#)
Chains	5	5	5
Atoms	8535 (Hydrogens: 4245)	4315 (Hydrogens: 0)	4290 (Hydrogens: 0)
Residues	Protein: 550 Nucleotide: 0	Protein: 555 Nucleotide: 0	Protein: 550 Nucleotide: 0
Water	0	0	0
Ligands	0	0	0
Bonds (RMSD)
Length (Å) (# > 4σ)	0.006 (15)	0.003 (0)	0.003 (0)
Angles (°) (# > 4σ)	0.699 (10)	0.758 (5)	0.884 (0)
MolProbity score	1.98	2.22	2.16
Clash score	14.32	22.71	26.17
Ramachandran plot (%)
Outliers	0	0	0
Allowed	4.63	5.5	3.7
Favored	95.37	94.5	96.3
Rama-Z (Ramachandran plot Z-score, RMSD)
whole (N = 540)	-2.46 (0.30)	-2.90 (0.29)	-1.28 (0.33)
helix (N = 0)	--- (---)	-3.48 (0.84)	-1.84 (1.07)
sheet (N = 160)	-1.74 (0.46)	-1.27 (0.35)	-0.38 (0.31)
loop (N = 380)	-1.71 (0.24)	-2.21 (0.26)	-1.10 (0.33)
Rotamer outliers (%)	0	0	0
Cβ outliers (%)	NA	NA	NA
Peptide plane (%)
Cis proline/general	33.3/0.0	28.6/0.0	33.3/0.0
Twisted proline/general	0.0/0.0	0.0/0.0	0.0/1.0
CaBLAM outliers (%)	2.83	1.87	3.77
ADP (B-factors)
Iso/Aniso (#)	4290/0	4315/0	4290/0
min/max/mean
Protein	311.84/446.13/375.67	250.02/795.91/470.81	343.54/628.84/480.26
Nucleotide	---	---	---
Ligand	---	---	---
Water	---	---	---
Occupancy
Mean	1	1	1
occ = 1 (%)	100	100	100
0 < occ < 1 (%)	0	0	0
occ > 1 (%)	0	0	0
Data
============================================	===================================	===================================	===================================
Box
Lengths (Å)	82.08, 83.16, 62.64	84.24, 85.32, 58.32	79.92, 81.00, 69.12
Angles (°)	90.00, 90.00, 90.00	90.00, 90.00, 90.00	90.00, 90.00, 90.00
Supplied Resolution (Å)	6	6	6
Resolution Estimates (Å)	Masked Unmasked	Masked Unmasked	Masked Unmasked
d FSC (half maps; 0.143)	--- ---	--- ---	--- ---
d 99 (full/half1/half2)	8.5/---/--- 8.5/---/---	8.1/---/--- 8.1/---/---	8.3/---/--- 8.3/---/---
d model	7.7 7.7	8.5 8.5	7.7 7.7
d FSC model (0/0.143/0.5)	4.3/6.2/18.9 4.3/6.2/2.6	5.5/6.3/18.2 5.5/6.3/18.2	5.0/6.1/12.2 5.0/6.1/11.3
Map min/max/mean	-9.45946	-10.4651	-15.1515
Model vs. Data
============================================	===================================	===================================	===================================
CC (mask)	0.67	0.67	0.69
CC (box)	0.79	0.75	0.8
CC (peaks)	0.56	0.56	0.62
CC (volume)	0.66	0.67	0.69
Mean CC for ligands	---	---	---

## Sheet: Sheet3
Sample name	Nucleosome in polynucleosome attached on magnetic beads	in vitro reconstituted H1.8-GFP nucleosome MagIC-cryo-EM	Interphase H1.8-GFP nucleosome MagIC-cryo-EM	Metaphase H1.8-GFP nucleosome MagIC-cryo-EM	Interphase & metaphase mixed H1.8-GFP nucleosome MagIC-cryo-EM	Interphase H1.8-GFP-NPM2 MagIC-cryo-EM
Deta collection
Microscope	Talos Arctica	Titan Krios	Titan Krios	Titan Krios	-	Titan Krios
Magnification	25,000	25,000	25,000	25,000	-	25,000
Voltage (kV)	200	300	300	300	-	300
Camera	Gatan K2 Summit	Gatan K3	Gatan K3	Gatan K3	-	Gatan K3
Electron exposure (e–/Å )		45.45	45.45	45.45	-
Defocus range (μm)					-
Pixel size (Å)					-
Micrographs					-
Data prosessing
Initial picked particle images (no.)					-
Nucleosome-like group particle (no.)					-
particle for 3D clasification (no.)					-
Particle images (no.)	41000
Symmetry imposed	C1	C1	C1	C1	C1	-
Map resolution (FSC=0.143)	4.84					-
EMDR ID	EMD-42599	EMD-42598	EMD-42596	EMD-42597	EMD-42594
